# Supplementary material for: Community seroprevalence of SARS-CoV-2 in children and adolescents in England, 2019–2021
Source: PubMed Central journal article supplement (PMC9887370; doi:10.1136/archdischild-2022-324375), 2022-07-20
Supplement: archdischild-2022-324375supp001.pdf [file archdischild-2022-324375supp001.pdf]

Table 1 Recruiting sites NHS region(s) and postcode districts where applicable

| Site              | NHS region(s)                 | Date of first recruit | Selected postcode districts |      |      |      |      |      |      |
|-------------------|-------------------------------|-----------------------|-----------------------------|------|------|------|------|------|------|
| Bradford          | Yorkshire and Humber          | 31/3/2020             | BD15                        | BD6  |      |      |      |      |      |
| Bristol           | South West                    | 9/4/2020              | BS2                         | BS20 | BS3  | BS37 | BS41 | BS8  |      |
| Imperial          | London                        | 8/2/2021              | SW1                         | SW3  | NW6  | NW8  | W11  | WC2  |      |
| Leeds             | Yorkshire and Humber          | 5/6/2020              | LS25                        | WF2  |      |      |      |      |      |
| Manchester        | North West                    | 12/6/2020             | M1                          | M12  | M20  | M23  | M25  | M6   |      |
| Newcastle         | North East                    | 7/1/2021              | NE3                         | NE12 | NE13 | NE20 | NE23 | NE28 |      |
| Nottingham*       | Midlands                      | 10/7/2020             |                             |      |      |      |      |      |      |
| Oxford            | South East                    | 15/10/2019            | HP17                        | HP22 | HP23 | MK13 | OX1  | OX11 | OX28 |
| Plymouth*         | East of England               | 3/6/2020              |                             |      |      |      |      |      |      |
| Sheffield         | South West                    | 20/4/2020             | S14                         | S43  |      |      |      |      |      |
| Southampton       | Yorkshire and Humber Midlands | 12/4/2020             | SO16                        | SO23 | SO24 | SO50 | SO51 | SO52 |      |
| St Georges London | South East                    | 26/3/2020             | CR4                         | KT18 | KT6  | SM3  | SW11 | SW20 |      |
| West Suffolk      | East of England               | 21/1/2021             | CB8                         | CB9  | CO10 | IP14 | IP24 | IP28 |      |

\*recruitment not restricted by postcode district

Table 2 Sensitivity, specificity and thresholds of positivity for anti-SARS-CoV-2 IgG spike protein antibodies (RocheS) and anti-SARS-CoV-2 IgG nucleocapsid antibodies (RocheN)<sup>13,14</sup>

|                         | RocheS                  | RocheN                   |
|-------------------------|-------------------------|--------------------------|
| Threshold of positivity | 0.8U/ml                 | 1.0 COI                  |
| Sensitivity             | 95.5% (95%CI 93.2-97.1) | 83.9% (95% CI 74.8-90.7) |
| Specificity             | 100% (95% CI 99.1-100)  | 100% (95% CI 99.1-100)   |

COI – cut off index

U/ml - units per millilitre

Table 3 Summary of participants aged 0-18 years tested for COVID-19 with RocheS - Anti-SARS-CoV-2 IgG spike protein antibodies and RocheN - Anti-SARS-CoV-2 IgG nucleocapsid antibodies assays

|                        | Seroprevalence |              | Symptoms    |             | Risk factor  |              |
|------------------------|----------------|--------------|-------------|-------------|--------------|--------------|
|                        | RocheS         | RocheN       | RocheS      | RocheN      | RocheS       | RocheN       |
| <b>Age group</b>       |                |              |             |             |              |              |
| <b>0-4 years</b>       | 532 (21.5%)    | 529 (21.4%)  | 289 (21.6%) | 287 (21.5%) | 516 (21.4%)  | 513 (21.3%)  |
| <b>5-9 years</b>       | 636 (25.7%)    | 636 (25.7%)  | 344 (25.7%) | 344 (25.7%) | 620 (25.7%)  | 620 (25.7%)  |
| <b>10-14 years</b>     | 721 (29.1%)    | 721 (29.1%)  | 377 (28.2%) | 377 (28.2%) | 705 (29.2%)  | 705 (29.3%)  |
| <b>15-18 years</b>     | 588 (23.7%)    | 589 (23.8%)  | 329 (24.6%) | 329 (24.6%) | 571 (23.7%)  | 572 (23.7%)  |
| <b>Sex</b>             |                |              |             |             |              |              |
| <b>Female</b>          | 1230 (49.7%)   | 1230 (49.7%) | 689 (51.5%) | 688 (51.5%) | 1198 (49.7%) | 1198 (49.7%) |
| <b>Male</b>            | 1247 (50.3%)   | 1245 (50.3%) | 650 (48.7%) | 649 (48.5%) | 1214 (50.3%) | 1212 (50.3%) |
| <b>NHS region</b>      |                |              |             |             |              |              |
| <b>East of England</b> | 171 (6.9%)     | 171 (6.9%)   | 96 (7.2%)   | 96 (7.2%)   | 156 (6.5%)   | 156 (6.5%)   |
| <b>London</b>          | 289 (11.7%)    | 289 (11.7%)  | 181 (13.6%) | 181 (13.5%) | 287 (11.9%)  | 287 (11.9%)  |
| <b>Midlands</b>        | 210 (8.5%)     | 211 (8.5%)   | 138 (10.3%) | 138 (10.3%) | 207 (8.6%)   | 208 (8.6%)   |

|                                                                                                             |              |              |              |              |              |              |
|-------------------------------------------------------------------------------------------------------------|--------------|--------------|--------------|--------------|--------------|--------------|
| <b>North East and Yorkshire</b>                                                                             | 419 (16.9%)  | 419 (16.9%)  | 232 (17.3%)  | 232 (17.4%)  | 410 (17.0%)  | 410 (17.0%)  |
| <b>North West</b>                                                                                           | 331 (13.4%)  | 331 (13.4%)  | 141 (10.5%)  | 141 (10.5%)  | 326 (13.5%)  | 326 (13.5%)  |
| <b>South East</b>                                                                                           | 633 (25.6%)  | 631 (25.5%)  | 260 (19.4%)  | 258 (19.3%)  | 607 (25.2%)  | 605 (25.1%)  |
| <b>South West</b>                                                                                           | 424 (17.1%)  | 423 (17.1%)  | 291 (21.7%)  | 291 (21.8%)  | 419 (17.4%)  | 418 (17.3%)  |
| <b>Time period</b>                                                                                          |              |              |              |              |              |              |
| <b>Pre-pandemic (01 Oct 2019 - 31 Mar 2020)</b>                                                             | 125 (5.0%)   | 125 (5.1%)   | 32 (2.4%)    | 32 (2.4%)    | 125 (5.2%)   | 125 (5.2%)   |
| <b>First wave (01 Apr 2020 - 31 May 2020)</b>                                                               | 335 (13.5%)  | 335 (13.5%)  | 74 (5.5%)    | 74 (5.5%)    | 334 (13.8%)  | 334 (13.9%)  |
| <b>Post first wave (01 Jun 2020 - 31 Aug 2020)</b>                                                          | 516 (20.8%)  | 515 (20.8%)  | 111 (8.3%)   | 111 (8.3%)   | 507 (21.0%)  | 506 (21.0%)  |
| <b>Schools reopening and second wave (01 Sep 2020 - 31 Dec 2020)</b>                                        | 464 (18.7%)  | 464 (18.7%)  | 298 (22.3%)  | 297 (22.2%)  | 456 (18.9%)  | 456 (18.9%)  |
| <b>Post second wave (01 Jan 2021 - 31 Mar 2021)</b>                                                         | 771 (31.1%)  | 770 (31.1%)  | 617 (46.1%)  | 616 (46.1%)  | 736 (30.5%)  | 735 (30.5%)  |
| <b>Emergence of delta variant (01 Apr 2021 - 30 Jun 2021)</b>                                               | 266 (10.7%)  | 266 (10.7%)  | 207 (15.5%)  | 207 (15.5%)  | 254 (10.5%)  | 254 (10.5%)  |
| <b>Ethnicity</b>                                                                                            |              |              |              |              |              |              |
| <b>White (White and White minorities)</b>                                                                   | 1991 (80.4%) | 1989 (80.4%) | 1073 (80.1%) | 1071 (80.1%) | 1987 (82.4%) | 1985 (82.4%) |
| <b>Black (African, Caribbean, Other Black background)</b>                                                   | 51 (2.1%)    | 51 (2.1%)    | 29 (2.2%)    | 29 (2.2%)    | 51 (2.1%)    | 51 (2.1%)    |
| <b>Asian (Bangladeshi, Pakistani, Indian, Chinese, Arab, other Asian background and other ethnic group)</b> | 144 (5.8%)   | 144 (5.8%)   | 99 (7.4%)    | 99 (7.4%)    | 144 (6.0%)   | 144 (6.0%)   |
| <b>Multiple ethnic backgrounds</b>                                                                          | 231 (9.3%)   | 231 (9.3%)   | 134 (10.0%)  | 134 (10.0%)  | 230 (9.5%)   | 230 (9.5%)   |
| <b>Not specified</b>                                                                                        | 60 (2.4%)    | 60 (2.4%)    | 4 (0.3%)     | 4 (0.3%)     |              |              |

|                                                |              |              |              |              |              |              |
|------------------------------------------------|--------------|--------------|--------------|--------------|--------------|--------------|
| <b>IMD quintile</b>                            |              |              |              |              |              |              |
| <b>Most deprived 1</b>                         | 357 (14.4%)  | 357 (14.4%)  | 179 (13.4%)  | 179 (13.4%)  | 352 (14.6%)  | 352 (14.6%)  |
| <b>2</b>                                       | 337 (13.6%)  | 336 (13.6%)  | 178 (13.3%)  | 177 (13.2%)  | 328 (13.6%)  | 327 (13.6%)  |
| <b>3</b>                                       | 461 (18.6%)  | 461 (18.6%)  | 247 (18.4%)  | 247 (18.5%)  | 446 (18.5%)  | 446 (18.5%)  |
| <b>4</b>                                       | 535 (21.7%)  | 534 (21.6%)  | 289 (21.6%)  | 289 (21.6%)  | 518 (21.5%)  | 517 (21.5%)  |
| <b>Least deprived 5</b>                        | 782 (31.6%)  | 782 (31.6%)  | 441 (33.0%)  | 440 (32.9%)  | 768 (31.8%)  | 768 (31.9%)  |
| <b>Not specified</b>                           | 5 (0.2%)     | 5 (0.2%)     | 5 (0.4%)     | 5 (0.4%)     |              |              |
| <b>IDACI quintile</b>                          |              |              |              |              |              |              |
| <b>Most deprived 1</b>                         | 374 (15.1%)  | 374 (15.1%)  | 188 (14.0%)  | 188 (14.1%)  | 368 (15.3%)  | 368 (15.3%)  |
| <b>2</b>                                       | 348 (14.0%)  | 347 (14.0%)  | 194 (14.5%)  | 193 (14.4%)  | 342 (14.2%)  | 341 (14.1%)  |
| <b>3</b>                                       | 451 (18.2%)  | 451 (18.2%)  | 225 (16.8%)  | 225 (16.8%)  | 433 (18.0%)  | 433 (18.0%)  |
| <b>4</b>                                       | 549 (22.2%)  | 541 (21.9%)  | 305 (22.8%)  | 305 (22.8%)  | 538 (22.3%)  | 537 (22.3%)  |
| <b>Least deprived 5</b>                        | 750 (30.3%)  | 750 (30.3%)  | 422 (31.5%)  | 421 (31.5%)  | 731 (30.3%)  | 731 (30.3%)  |
| <b>Not specified</b>                           | 5 (0.2%)     | 5 (0.2%)     | 5 (0.4%)     | 5 (0.4%)     |              |              |
| <b>Urban/rural</b>                             |              |              |              |              |              |              |
| <b>Urban</b>                                   | 1984 (80.1%) | 1982 (80.1%) | 1076 (80.4%) | 1075 (80.4%) | 1933 (80.1%) | 1931 (80.1%) |
| <b>Rural</b>                                   | 493 (19.9%)  | 493 (19.9%)  | 263 (19.6%)  | 262 (19.6%)  | 479 (19.9%)  | 479 (19.9%)  |
| <b>Member of family is a healthcare worker</b> |              |              |              |              |              |              |
| <b>Yes</b>                                     | 628 (25.4%)  | 627 (25.3%)  | 421 (31.5%)  | 421 (31.5%)  | 626 (26.0%)  | 625 (25.9%)  |
| <b>No</b>                                      | 1269 (51.2%) | 1268 (51.2%) | 804 (60.0%)  | 802 (60.0%)  | 1262 (52.3%) | 1261 (52.3%) |
| <b>Not specified</b>                           | 580 (23.4%)  | 580 (23.4%)  | 114 (8.5%)   | 114 (8.5%)   | 524 (21.7%)  | 524 (21.7%)  |
| <b>Total</b>                                   | 2477         | 2475         | 1339         | 1337         | 2412         | 2410         |

Table 4 Comparing regional populations (0-18 years) with the STORY sample (0-18 years olds) including vaccinated individuals

| NHS region                         | East of England         |                               | London                  |                               | Midlands                |                               | North East and Yorkshire |                               | North West              |                               | South East              |                               | South West              |                               |
|------------------------------------|-------------------------|-------------------------------|-------------------------|-------------------------------|-------------------------|-------------------------------|--------------------------|-------------------------------|-------------------------|-------------------------------|-------------------------|-------------------------------|-------------------------|-------------------------------|
|                                    | Region (0-18 years (%)) | STORY sample (0-18 years (%)) | Region (0-18 years (%)) | STORY sample (0-18 years (%)) | Region (0-18 years (%)) | STORY sample (0-18 years (%)) | Region (0-18 years (%))  | STORY sample (0-18 years (%)) | Region (0-18 years (%)) | STORY sample (0-18 years (%)) | Region (0-18 years (%)) | STORY sample (0-18 years (%)) | Region (0-18 years (%)) | STORY sample (0-18 years (%)) |
| <b>White*</b>                      | 1146365.8<br>(82.4)     | 140<br>(88.6)                 | 998497.8<br>(45.4)      | 199<br>(67.7)                 | 852484.5<br>(75.4)      | 178<br>(84.8)                 | 941658.8<br>(89.5)       | 361 (86.8)                    | 1309834.6<br>(80.8)     | 235<br>(68.5)                 | 1709830.1<br>(82.5)     | 531<br>(84.4)                 | 1045274.7<br>(90.7)     | 393<br>(91.2)                 |
| <b>Black**</b>                     | 46559.0<br>(3.3)        | 2<br>(1.3)                    | 374912.9<br>(17.0)      | 19<br>(6.5)                   | 37043.3<br>(3.3)        | 4<br>(1.9)                    | 19364.3<br>(1.8)         | 7<br>(1.7)                    | 36393.4<br>(2.2)        | 14<br>(4.1)                   | 55537.4<br>(2.7)        | 4<br>(0.6)                    | 18522.2<br>(1.6)        | 2<br>(0.5)                    |
| <b>Asian***</b>                    | 111665.8<br>(8.0)       | 4<br>(2.5)                    | 518125.2<br>(23.5)      | 30<br>(10.2)                  | 169453.2<br>(15.0)      | 12<br>(5.7)                   | 32584.5<br>(3.1)         | 17<br>(4.0)                   | 190051.5<br>(11.7)      | 49<br>(14.3)                  | 174174.6<br>(8.4)       | 28<br>(4.4)                   | 36856.3<br>(3.2)        | 10<br>(2.3)                   |
| <b>Multiple ethnic backgrounds</b> | 86007.6<br>(6.2)        | 12<br>(7.6)                   | 310162.9<br>(14.1)      | 46<br>(15.6)                  | 71616.5<br>(6.3)        | 16<br>(7.6)                   | 58044.7<br>(5.5)         | 31<br>(7.5)                   | 84851.4<br>(5.2)        | 45<br>(13.1)                  | 131887.0<br>(6.4)       | 67<br>(10.6)                  | 51275.7<br>(4.5)        | 26<br>(6.0)                   |
| <b>total</b>                       | 1390598.2               | 158.0                         | 2201698.7               | 294.0                         | 1130597.5               | 210.0                         | 1051652.4                | 416.0                         | 1621130.9               | 343.0                         | 2071429.2               | 630.0                         | 1151928.9               | 431.0                         |

\*White including white minorities

\*\*Black (African, Caribbean, Other Black background)

\*\*\* Asian (Bangladeshi, Chinese, Indian, Pakistani, Other Asian background)

*Table 5 Comparing children aged 0-15 years on IDACI and IMD by region as a measure of socioeconomic deprivation in children IMD and IDACI derived from postcode of participant, FASiii and Census 2011 home ownership and house size questions data were collected on the questionnaire*

|                                 |                                                                       | Quintile |      |      |      |       |
|---------------------------------|-----------------------------------------------------------------------|----------|------|------|------|-------|
|                                 |                                                                       | 1        | 2    | 3    | 4    | 5     |
| <b>Overall</b>                  | <b>IMD</b>                                                            | 303      | 280  | 409  | 453  | 663   |
|                                 | Number (%) of families that own their own home in each IMD quintile   | 50.8     | 69.4 | 77.9 | 81.7 | 85.8  |
|                                 | Average number of rooms in home in each IMD quintile                  | 5.6      | 6.1  | 6.6  | 7.0  | 7.3   |
|                                 | Average Number of bedrooms in home in each IMD quintile               | 2.9      | 3.2  | 3.5  | 3.6  | 3.8   |
|                                 | Mean FASiii score in each IMD quintile                                | 6.5      | 7.7  | 8.7  | 8.9  | 9.5   |
|                                 | <b>IDACI</b>                                                          | 315      | 304  | 481  | 476  | 632   |
|                                 | Number (%) of families that own their own home in each IDACI quintile | 49.8     | 66.4 | 79.8 | 81.6 | 87.7  |
|                                 | Average number of rooms in home in each IDACI quintile                | 5.6      | 6.1  | 6.6  | 6.8  | 7.5   |
|                                 | Average Number of bedrooms in home in each IDACI quintile             | 2.9      | 3.2  | 3.5  | 3.6  | 3.8   |
|                                 | Mean FASiii score in each IDACI quintile                              | 6.6      | 7.7  | 8.6  | 8.9  | 9.5   |
| <b>East of England</b>          | <b>IMD</b>                                                            | 16       | 22   | 44   | 40   | 25    |
|                                 | Number (%) of families that own their own home in each IMD quintile   | 30.8     | 59.1 | 65.8 | 86.1 | 100.0 |
|                                 | Average number of rooms in home in each IMD quintile                  | 5.8      | 6.6  | 6.8  | 7.4  | 7.8   |
|                                 | Average Number of bedrooms in home in each IMD quintile               | 2.9      | 3.5  | 3.3  | 3.9  | 3.7   |
|                                 | Mean FASiii score in each IMD quintile                                | 6.4      | 7.6  | 7.8  | 9.3  | 9.7   |
|                                 | <b>IDACI</b>                                                          | 24       | 22   | 30   | 40   | 31    |
|                                 | Number (%) of families that own their own home in each IDACI quintile | 33.3     | 59.1 | 72.0 | 88.6 | 93.1  |
|                                 | Average number of rooms in home in each IDACI quintile                | 6.2      | 5.2  | 7.2  | 7.1  | 8.0   |
|                                 | Average Number of bedrooms in home in each IDACI quintile             | 3.0      | 3.4  | 3.8  | 3.5  | 3.8   |
|                                 | Mean FASiii score in each IDACI quintile                              | 6.5      | 7.2  | 9.2  | 8.5  | 9.7   |
| <b>London</b>                   | <b>IMD</b>                                                            | 9        | 41   | 61   | 48   | 79    |
|                                 | Number (%) of families that own their own home in each IMD quintile   | 22.2     | 36.6 | 73.8 | 83.3 | 84.6  |
|                                 | Average number of rooms in home in each IMD quintile                  | 4.8      | 5.1  | 5.9  | 6.7  | 6.8   |
|                                 | Average Number of bedrooms in home in each IMD quintile               | 2.3      | 2.9  | 3.2  | 3.5  | 3.8   |
|                                 | Mean FASiii score in each IMD quintile                                | 5.8      | 7.5  | 8.5  | 9.3  | 9.7   |
|                                 | <b>IDACI</b>                                                          | 18       | 55   | 35   | 61   | 69    |
|                                 | Number (%) of families that own their own home in each IDACI quintile | 27.8     | 50.9 | 74.3 | 80.3 | 88.2  |
|                                 | Average number of rooms in home in each IDACI quintile                | 4.6      | 5.3  | 6.1  | 6.4  | 7.0   |
|                                 | Average Number of bedrooms in home in each IDACI quintile             | 2.5      | 2.9  | 3.3  | 3.6  | 3.9   |
|                                 | Mean FASiii score in each IDACI quintile                              | 7.2      | 7.5  | 8.3  | 9.2  | 10.1  |
| <b>Midlands</b>                 | <b>IMD</b>                                                            | 17       | 30   | 34   | 30   | 44    |
|                                 | Number (%) of families that own their own home in each IMD quintile   | 58.8     | 67.9 | 84.8 | 86.7 | 95.3  |
|                                 | Average number of rooms in home in each IMD quintile                  | 6.8      | 6.3  | 6.4  | 7.1  | 7.8   |
|                                 | Average Number of bedrooms in home in each IMD quintile               | 3.6      | 3.4  | 3.5  | 3.7  | 4.0   |
|                                 | Mean FASiii score in each IMD quintile                                | 7.5      | 8.3  | 8.8  | 9.1  | 9.8   |
|                                 | <b>IDACI</b>                                                          | 23       | 32   | 31   | 35   | 34    |
|                                 | Number (%) of families that own their own home in each IDACI quintile | 52.2     | 75.9 | 83.9 | 91.2 | 97.1  |
|                                 | Average number of rooms in home in each IDACI quintile                | 6.6      | 6.4  | 6.3  | 7.3  | 7.9   |
|                                 | Average Number of bedrooms in home in each IDACI quintile             | 3.4      | 3.5  | 3.4  | 3.9  | 4.0   |
|                                 | Mean FASiii score in each IDACI quintile                              | 7.7      | 8.5  | 8.7  | 9.5  | 9.7   |
| <b>North East and Yorkshire</b> | <b>IMD</b>                                                            | 88       | 59   | 61   | 57   | 89    |
|                                 | Number (%) of families that own their own home in each IMD quintile   | 58.8     | 82.5 | 81.7 | 91.1 | 88.6  |
|                                 | Average number of rooms in home in each IMD quintile                  | 5.5      | 6.3  | 6.8  | 7.1  | 7.4   |

|                   |                                                                       |      |      |      |      |      |
|-------------------|-----------------------------------------------------------------------|------|------|------|------|------|
|                   | Average Number of bedrooms in home in each IMD quintile               | 2.9  | 3.2  | 3.6  | 3.6  | 3.7  |
|                   | Mean FASiii score in each IMD quintile                                | 6.8  | 7.2  | 8.7  | 9.3  | 9.0  |
|                   | IDACI                                                                 | 83   | 57   | 68   | 41   | 105  |
|                   | Number (%) of families that own their own home in each IDACI quintile | 60.0 | 73.2 | 83.3 | 87.5 | 92.3 |
|                   | Average number of rooms in home in each IDACI quintile                | 5.6  | 6.3  | 6.8  | 6.7  | 7.4  |
|                   | Average Number of bedrooms in home in each IDACI quintile             | 3.0  | 3.2  | 3.5  | 3.5  | 3.7  |
|                   | Mean FASiii score in each IDACI quintile                              | 6.7  | 7.3  | 8.6  | 8.8  | 9.1  |
| <b>North West</b> | <b>IMD</b>                                                            | 119  | 54   | 71   | 51   | 2    |
|                   | Number (%) of families that own their own home in each IMD quintile   | 51.7 | 86.5 | 81.7 | 85.7 | 50.0 |
|                   | Average number of rooms in home in each IMD quintile                  | 5.7  | 6.5  | 7.3  | 7.8  | 8.0  |
|                   | Average Number of bedrooms in home in each IMD quintile               | 2.9  | 3.4  | 3.9  | 4.2  | 4.5  |
|                   | Mean FASiii score in each IMD quintile                                | 6.5  | 8.4  | 9.0  | 8.7  | 9.5  |
|                   | IDACI                                                                 | 116  | 27   | 50   | 41   | 63   |
|                   | Number (%) of families that own their own home in each IDACI quintile | 52.2 | 74.1 | 87.5 | 70.0 | 91.9 |
|                   | Average number of rooms in home in each IDACI quintile                | 5.7  | 6.0  | 7.3  | 6.4  | 8.1  |
|                   | Average Number of bedrooms in home in each IDACI quintile             | 3.0  | 3.2  | 3.7  | 3.7  | 4.3  |
|                   | Mean FASiii score in each IDACI quintile                              | 6.5  | 8.0  | 8.3  | 8.5  | 9.3  |
| <b>South East</b> | <b>IMD</b>                                                            | 23   | 40   | 81   | 112  | 293  |
|                   | Number (%) of families that own their own home in each IMD quintile   | 27.3 | 63.2 | 73.7 | 76.9 | 80.4 |
|                   | Average number of rooms in home in each IMD quintile                  | 5.6  | 5.9  | 6.1  | 7.1  | 7.3  |
|                   | Average Number of bedrooms in home in each IMD quintile               | 2.7  | 3.1  | 3.3  | 3.5  | 3.9  |
|                   | Mean FASiii score in each IMD quintile                                | 6.3  | 7.6  | 8.4  | 9.4  | 9.4  |
|                   | IDACI                                                                 | 19   | 68   | 104  | 152  | 206  |
|                   | Number (%) of families that own their own home in each IDACI quintile | 23.5 | 65.7 | 72.6 | 77.7 | 82.5 |
|                   | Average number of rooms in home in each IDACI quintile                | 5.3  | 6.1  | 6.5  | 7.0  | 7.5  |
|                   | Average Number of bedrooms in home in each IDACI quintile             | 2.5  | 3.2  | 3.5  | 3.6  | 3.8  |
|                   | Mean FASiii score in each IDACI quintile                              | 5.5  | 8.0  | 8.7  | 9.2  | 9.6  |
| <b>South West</b> | <b>IMD</b>                                                            | 31   | 34   | 57   | 115  | 131  |
|                   | Number (%) of families that own their own home in each IMD quintile   | 54.8 | 75.8 | 83.6 | 76.1 | 91.3 |
|                   | Average number of rooms in home in each IMD quintile                  | 5.1  | 5.8  | 6.9  | 6.4  | 7.3  |
|                   | Average Number of bedrooms in home in each IMD quintile               | 2.8  | 3.4  | 3.5  | 3.5  | 3.8  |
|                   | Mean FASiii score in each IMD quintile                                | 6.1  | 7.5  | 8.5  | 8.2  | 9.5  |
|                   | IDACI                                                                 | 32   | 43   | 63   | 106  | 124  |
|                   | Number (%) of families that own their own home in each IDACI quintile | 51.6 | 71.4 | 85.2 | 84.8 | 85.8 |
|                   | Average number of rooms in home in each IDACI quintile                | 5.2  | 6.5  | 6.4  | 6.7  | 7.2  |
|                   | Average Number of bedrooms in home in each IDACI quintile             | 2.9  | 3.3  | 3.3  | 3.7  | 3.7  |
|                   | Mean FASiii score in each IDACI quintile                              | 6.3  | 7.6  | 8.5  | 8.6  | 9.2  |

Figure 1 A comparison of results by the RocheN - Anti-SARS-CoV-2 IgG nucleocapsid antibodies assay and RocheS - Anti-SARS-CoV-2 IgG spike protein antibodies assay by age

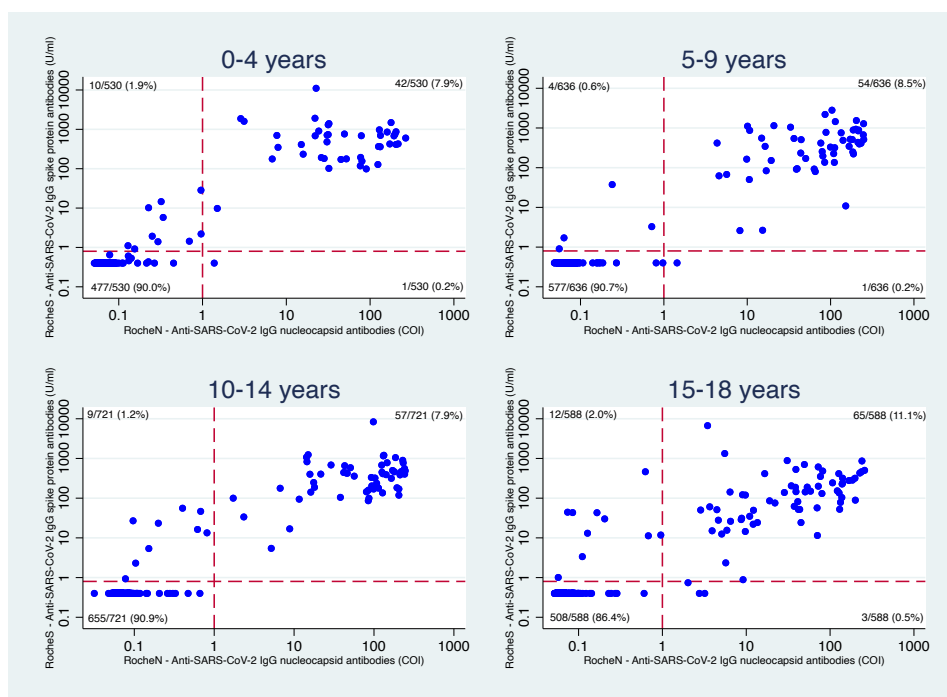

Assay positivity thresholds indicated as red dashed lines (0.8 U/ml for Spike and 1 COI for Nucleocapsid)  
COI – cut off index, U/ml (units per millilitre)

Table 6 SARS-CoV-2 seroprevalence (RocheS - Anti-SARS-CoV-2 IgG spike protein antibodies and RocheN - Anti-SARS-CoV-2 IgG nucleocapsid antibodies) by age group and time period October 2019 to June 2021 in England, adjusted for age, region and ethnicity

| Period                                                     | RocheS |            |                     | RocheN |            |                     |
|------------------------------------------------------------|--------|------------|---------------------|--------|------------|---------------------|
|                                                            | N      | Crude rate | Adjusted rate       | N      | Crude rate | Adjusted rate       |
| <b>Pre-pandemic (Oct 19 - Mar 20)</b>                      | 125    | 0.0%       | 0.0%                | 125    | 0.0%       | 0.0%                |
| <b>First wave (Apr 20 - May 20)</b>                        | 335    | 3.9%       | 2.2% (0.9%-3.4%)    | 335    | 3.6%       | 1.8% (0.8%-2.8%)    |
| <b>Post first wave (Jun 20 - Aug 20)</b>                   | 516    | 3.9%       | 5.2% (3.2%-7.2%)    | 515    | 3.7%       | 5.1% (3.1%-7.2%)    |
| <b>Schools reopening and second wave (Sep 20 - Dec 20)</b> | 464    | 6.9%       | 7.1% (5.5%-8.6%)    | 464    | 6.0%       | 7.3% (5.5%-9.1%)    |
| <b>Post second wave (Jan 21 - Mar 21)</b>                  | 771    | 17.5%      | 17.6% (14.4%-20.9%) | 770    | 15.2%      | 16.2% (12.9%-19.4%) |
| <b>Emergence of delta variant (Apr 21 - Jun 21)</b>        | 266    | 19.9%      | 19.9% (16.1%-23.7%) | 266    | 17.7%      | 16.8% (13.1%-20.6%) |



Table 7 SARS-CoV-2 seroprevalence (RocheS - Anti-SARS-CoV-2 IgG spike protein antibodies and RocheN - Anti-SARS-CoV-2 IgG nucleocapsid antibodies) by age group and time period October 2019 to June 2021 in England, adjusted for NHS region and ethnicity

|                    |                                                     | RocheS |       |                     | RocheN |       |                     |
|--------------------|-----------------------------------------------------|--------|-------|---------------------|--------|-------|---------------------|
|                    |                                                     | N      | Crude | Adjusted            | N      | Crude | Adjusted            |
| <b>0-4 years</b>   | Pre-pandemic (Oct 19 - Mar 20)                      | 25     | 0.0%  | 0.0%                | 25     | 0.0%  | 0.0%                |
|                    | First wave (Apr 20-May 20)                          | 62     | 1.6%  | 0.7% (0.0%-2.1%)    | 62     | 1.6%  | 0.7% (0.0%-2.1%)    |
|                    | Post first wave (Jun 20 - Aug 20)                   | 64     | 4.7%  | 4.7% (0.0%-10.2%)   | 63     | 4.8%  | 4.7% (0.0%-10.3%)   |
|                    | Schools reopening and second wave (Sep 20 - Dec 20) | 77     | 5.2%  | 5.3% (2.2%-8.4%)    | 76     | 6.6%  | 6.2% (2.7%-9.8%)    |
|                    | Post second wave (Jan 21 -Mar 21)                   | 200    | 13.5% | 13.0% (6.7%-19.3%)  | 199    | 10.1% | 11.7% (5.5%-18.0%)  |
|                    | Emergence of delta variant (Apr 21 - Jun 21)        | 104    | 16.3% | 13.9% (4.5%-23.2%)  | 104    | 13.5% | 12.2% (3.1%-21.4%)  |
| <b>5-9 years</b>   | Pre-pandemic (Oct 19 - Mar 20)                      | 31     | 0.0%  | 0.0%                | 31     | 0.0%  | 0.0%                |
|                    | First wave (Apr 20-May 20)                          | 83     | 3.6%  | 2.5% (0.0%-5.0%)    | 83     | 3.6%  | 2.5% (0.0%-5.0%)    |
|                    | Post first wave (Jun 20 - Aug 20)                   | 144    | 4.9%  | 9.5% (8.2%-10.9%)   | 144    | 3.5%  | 8.9% (7.9%-10.0%)   |
|                    | Schools reopening and second wave (Sep 20 - Dec 20) | 119    | 3.4%  | 1.8% (0.0%-3.5%)    | 119    | 3.4%  | 3.6% (0.0%-7.3%)    |
|                    | Post second wave (Jan 21 -Mar 21)                   | 187    | 15.0% | 17.8% (11.5%-24.1%) | 187    | 15.0% | 17.8% (11.5%-24.1%) |
|                    | Emergence of delta variant (Apr 21 - Jun 21)        | 72     | 22.2% | 18.9% (15.5%-22.3%) | 72     | 20.8% | 18.5% (15.2%-21.9%) |
| <b>10-14 years</b> | Pre-pandemic (Oct 19 - Mar 20)                      | 41     | 0.0%  | 0.0%                | 41     | 0.0%  | 0.0%                |
|                    | First wave (Apr 20-May 20)                          | 108    | 3.7%  | 3.2% (0.0%-6.5%)    | 108    | 2.8%  | 1.7% (0.0%-3.5%)    |
|                    | Post first wave (Jun 20 - Aug 20)                   | 174    | 2.3%  | 0.9% (0.0%-1.8%)    | 174    | 2.3%  | 0.9% (0.0%-1.8%)    |
|                    | Schools reopening and second wave (Sep 20 - Dec 20) | 152    | 5.3%  | 2.5% (0.6%-4.4%)    | 152    | 5.3%  | 2.5% (0.6%-4.4%)    |
|                    | Post second wave (Jan 21 -Mar 21)                   | 195    | 21.5% | 20.6% (13.6%-27.6%) | 195    | 17.9% | 18.1% (11.3%-24.9%) |
|                    | Emergence of delta variant (Apr 21 - Jun 21)        | 51     | 15.7% | 17.6% (9.7%-25.5%)  | 51     | 13.7% | 16.6% (8.9%-24.3%)  |
| <b>15-18 years</b> | Pre-pandemic (Oct 19 - Mar 20)                      | 28     | 0.0%  | 0.0%                | 28     | 0.0%  | 0.0%                |
|                    | First wave (Apr 20-May 20)                          | 82     | 6.1%  | 2.5% (0.5%-4.5%)    | 82     | 6.1%  | 2.5% (0.5%-4.5%)    |
|                    | Post first wave (Jun 20 - Aug 20)                   | 134    | 4.5%  | 4.6% (0.5%-8.7%)    | 134    | 5.2%  | 5.1% (1.0%-9.3%)    |
|                    | Schools reopening and second wave (Sep 20 - Dec 20) | 116    | 13.8% | 23.2% (17.4%-29.0%) | 117    | 9.4%  | 20.7% (15.3%-26.0%) |
|                    | Post second wave (Jan 21 -Mar 21)                   | 189    | 20.1% | 19.5% (13.8%-25.1%) | 189    | 18.0% | 17.0% (11.5%-22.4%) |
|                    | Emergence of delta variant (Apr 21 - Jun 21)        | 39     | 30.8% | 32.7% (23.6%-41.8%) | 39     | 28.2% | 21.2% (12.1%-30.4%) |

Table 8 SARS-CoV-2 seroprevalence (RocheS - Anti-SARS-CoV-2 IgG spike protein antibodies and RocheN - Anti-SARS-CoV-2 IgG nucleocapsid antibodies) by region and time period October 2019 to June 2021 in England, adjusted for age and ethnicity

|                                                              |                        | RocheS |       |                     | RocheN |       |                     |
|--------------------------------------------------------------|------------------------|--------|-------|---------------------|--------|-------|---------------------|
|                                                              |                        | N      | Crude | Adjusted            | N      | Crude | Adjusted            |
| <b>Pre-pandemic</b><br>(Oct 19 - Mar 20)                     | East of England        | 21     | 0.0%  | 0.0%                | 21     | 0.0%  | 0.0%                |
|                                                              | London                 | 10     | 0.0%  | 0.0%                | 10     | 0.0%  | 0.0%                |
|                                                              | Midlands               | 0      | 0.0%  | 0.0%                | 0      | 0.0%  | 0.0%                |
|                                                              | North East & Yorkshire | 2      | 0.0%  | 0.0%                | 2      | 0.0%  | 0.0%                |
|                                                              | North West             | 0      | 0.0%  | 0.0%                | 0      | 0.0%  | 0.0%                |
|                                                              | South East             | 92     | 0.0%  | 0.0%                | 92     | 0.0%  | 0.0%                |
|                                                              | South West             | 0      | 0.0%  | 0.0%                | 0      | 0.0%  | 0.0%                |
| <b>First wave</b> (Apr 20 - May 20)                          | East of England        | 16     | 6.3%  | 3.3% (0.0%-9.3%)    | 16     | 6.3%  | 0.0%                |
|                                                              | London                 | 55     | 12.7% | 10.2% (3.0%-17.3%)  | 55     | 12.7% | 10.2% (3.0%-17.3%)  |
|                                                              | Midlands               | 27     | 0.0%  | 0.0%                | 27     | 0.0%  | 0.0%                |
|                                                              | North East & Yorkshire | 64     | 3.1%  | 3.8% (0.0%-8.4%)    | 64     | 3.1%  | 3.8% (0.0%-8.4%)    |
|                                                              | North West             | 0      | 0.0%  | 0.0%                | 0      | 0.0%  | 0.0%                |
|                                                              | South East             | 134    | 2.2%  | 1.5% (0.0%-3.1%)    | 133    | 2.3%  | 1.5% (0.0%-3.1%)    |
|                                                              | South West             | 39     | 0.0%  | 0.0%                | 39     | 0.0%  | 0.0%                |
| <b>Post first wave</b><br>(Jun 20- Aug 20)                   | East of England        | 9      | 0.0%  | 0.0%                | 9      | 0.0%  | 0.0%                |
|                                                              | London                 | 14     | 21.4% | 33.9% (18.7%-49.1%) | 14     | 21.4% | 33.9% (18.7%-49.1%) |
|                                                              | Midlands               | 46     | 2.2%  | 0.9% (0.0%-2.7%)    | 46     | 2.2%  | 0.9% (0.0%-2.7%)    |
|                                                              | North East & Yorkshire | 73     | 0.0%  | 0.0%                | 73     | 0.0%  | 0.0%                |
|                                                              | North West             | 127    | 6.3%  | 5.8% (1.9%-9.7%)    | 125    | 6.4%  | 5.9% (2.0%-9.8%)    |
|                                                              | South East             | 97     | 0.0%  | 0.0%                | 94     | 0.0%  | 0.0%                |
|                                                              | South West             | 39     | 0.0%  | 0.0%                | 39     | 0.0%  | 0.0%                |
| <b>Schools reopening and second wave</b><br>(Sep 20- Dec 20) | East of England        | 11     | 0.0%  | 0.0%                | 11     | 0.0%  | 0.0%                |
|                                                              | London                 | 12     | 16.7% | 8.4% (2.0%-14.7%)   | 12     | 16.7% | 8.4% (2.0%-14.7%)   |
|                                                              | Midlands               | 77     | 6.5%  | 2.6% (0.1%-5.0%)    | 75     | 5.3%  | 5.2% (0.1%-10.3%)   |
|                                                              | North East & Yorkshire | 62     | 11.3% | 11.6% (5.7%-17.4%)  | 61     | 9.8%  | 10.5% (5.0%-16.0%)  |
|                                                              | North West             | 61     | 11.5% | 15.1% (9.5%-20.7%)  | 61     | 11.5% | 15.4% (9.3%-21.4%)  |
|                                                              | South East             | 127    | 3.9%  | 3.8% (0.7%-6.9%)    | 122    | 4.1%  | 3.0% (0.2%-5.8%)    |
|                                                              | South West             | 114    | 5.3%  | 5.1% (0.0%-10.2%)   | 114    | 5.3%  | 4.6% (0.0%-9.6%)    |
| <b>Post second wave</b><br>(Jan 21 - Mar 21)                 | East of England        | 88     | 9.1%  | 13.2% (8.9%-17.5%)  | 76     | 10.5% | 11.2% (7.7%-14.8%)  |
|                                                              | London                 | 115    | 26.1% | 24.1% (15.1%-33.1%) | 115    | 26.1% | 22.8% (13.9%-31.8%) |
|                                                              | Midlands               | 49     | 14.3% | 15.5% (5.4%-25.6%)  | 48     | 14.6% | 15.5% (5.4%-25.6%)  |
|                                                              | North East & Yorkshire | 193    | 16.1% | 14.8% (9.9%-19.7%)  | 187    | 16.6% | 12.4% (7.7%-17.0%)  |
|                                                              | North West             | 116    | 28.4% | 26.8% (18.0%-35.7%) | 115    | 27.8% | 24.0% (15.4%-32.6%) |
|                                                              | South East             | 120    | 10.8% | 11.5% (5.3%-17.8%)  | 109    | 11.0% | 11.6% (5.3%-17.9%)  |
|                                                              | South West             | 90     | 14.4% | 18.5% (10.8%-26.2%) | 89     | 14.6% | 16.4% (9.1%-23.7%)  |
|                                                              | East of England        | 26     | 7.7%  | 2.0% (0.0%-5.8%)    | 23     | 4.3%  | 2.0% (0.0%-5.8%)    |

|                                                                        |                                   |    |       |                     |    |       |                     |
|------------------------------------------------------------------------|-----------------------------------|----|-------|---------------------|----|-------|---------------------|
| <b><i>Emergence of<br/>delta variant<br/>(Apr 21 - Jun<br/>21)</i></b> | <b>London</b>                     | 83 | 24.1% | 25.8% (13.8%-37.8%) | 83 | 24.1% | 20.6% (9.7%-31.5%)  |
|                                                                        | <b>Midlands</b>                   | 11 | 18.2% | 11.3% (0.7%-21.9%)  | 11 | 18.2% | 11.3% (0.7%-21.9%)  |
|                                                                        | <b>North East &amp; Yorkshire</b> | 25 | 24.0% | 23.7% (20.3%-27.0%) | 25 | 24.0% | 7.8% (4.8%-10.9%)   |
|                                                                        | <b>North West</b>                 | 27 | 40.7% | 51.9% (33.4%-70.5%) | 26 | 42.3% | 51.9% (33.4%-70.5%) |
|                                                                        | <b>South East</b>                 | 63 | 11.1% | 6.0% (0.1%-11.9%)   | 57 | 10.5% | 5.6% (0.0%-11.5%)   |
|                                                                        | <b>South West</b>                 | 31 | 16.1% | 26.6% (22.0%-31.2%) | 31 | 16.1% | 28.9% (23.3%-34.6%) |

Figure 2 Summary of symptoms reported by seropositive participants on RocheN Anti-SARS-CoV nucleocapsid antibodies assay by age group. Error bars show 95% confidence intervals

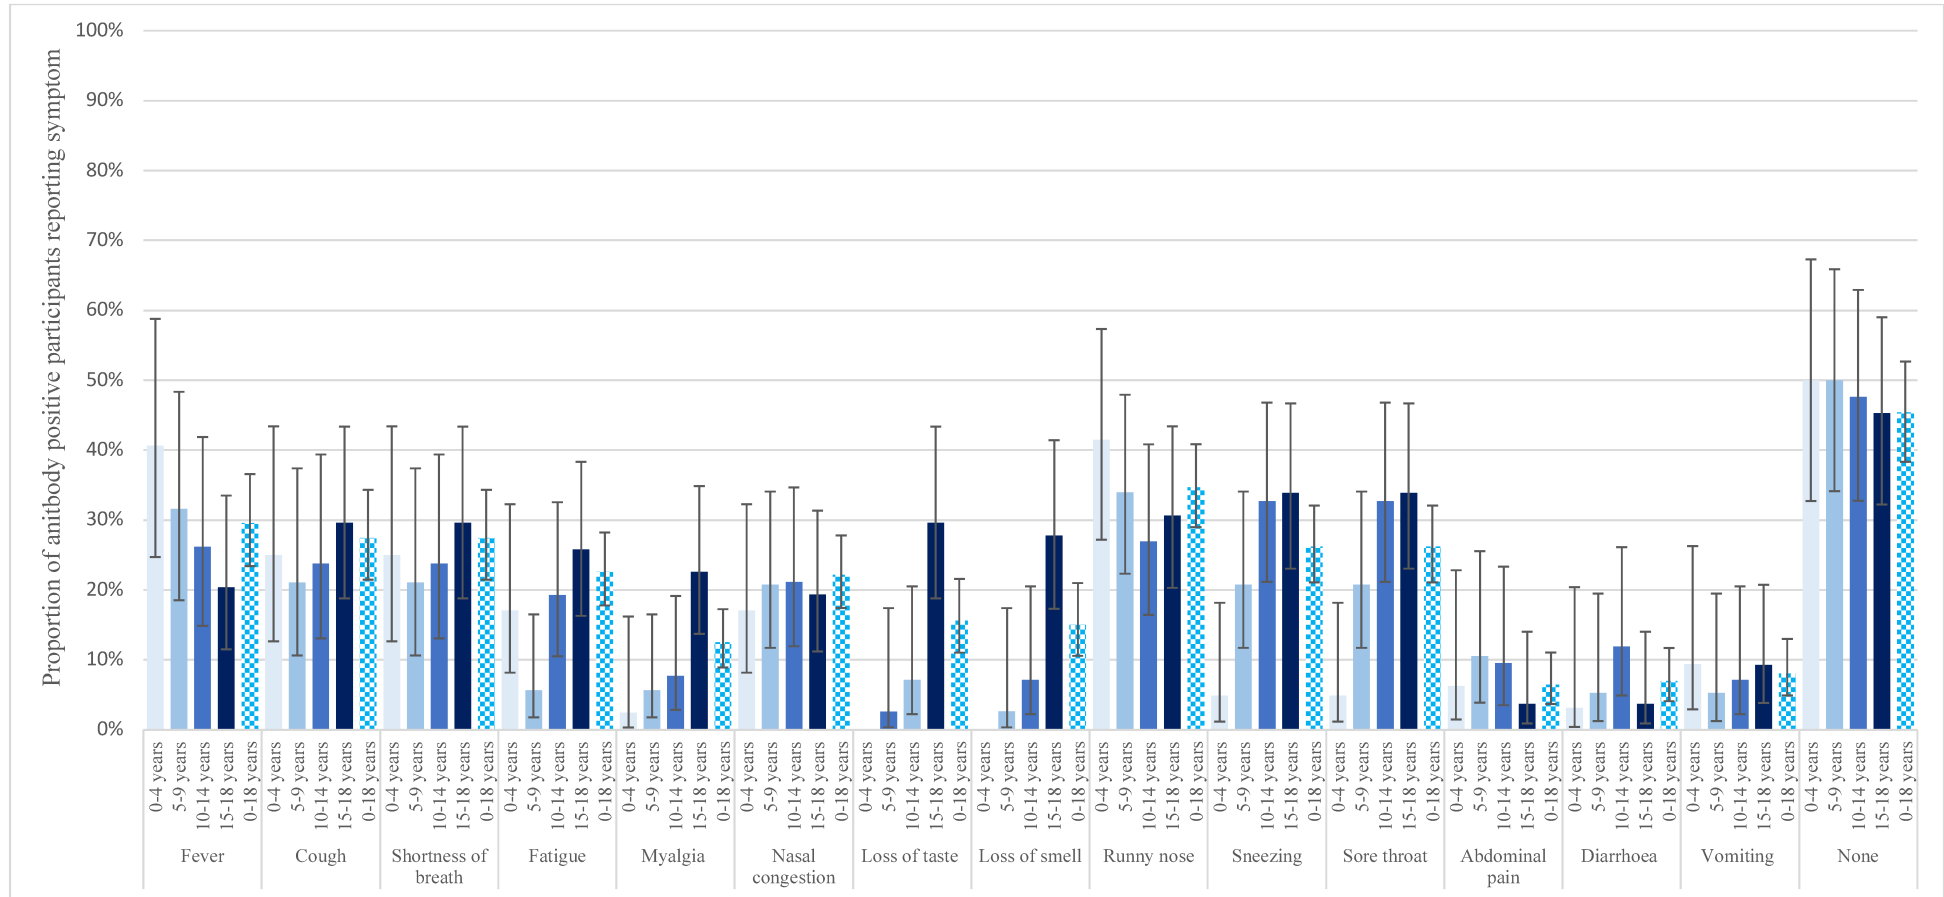

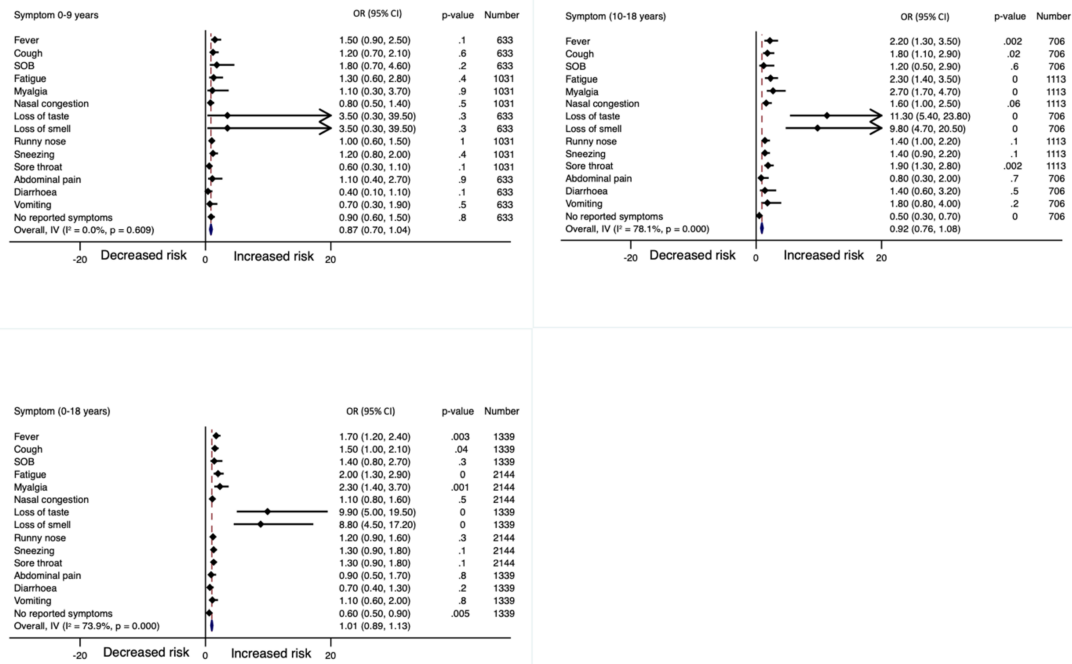

Figure 3a Univariate analysis of symptoms by age band (RocheS - Anti-SARS-CoV-2 IgG spike protein antibodies)

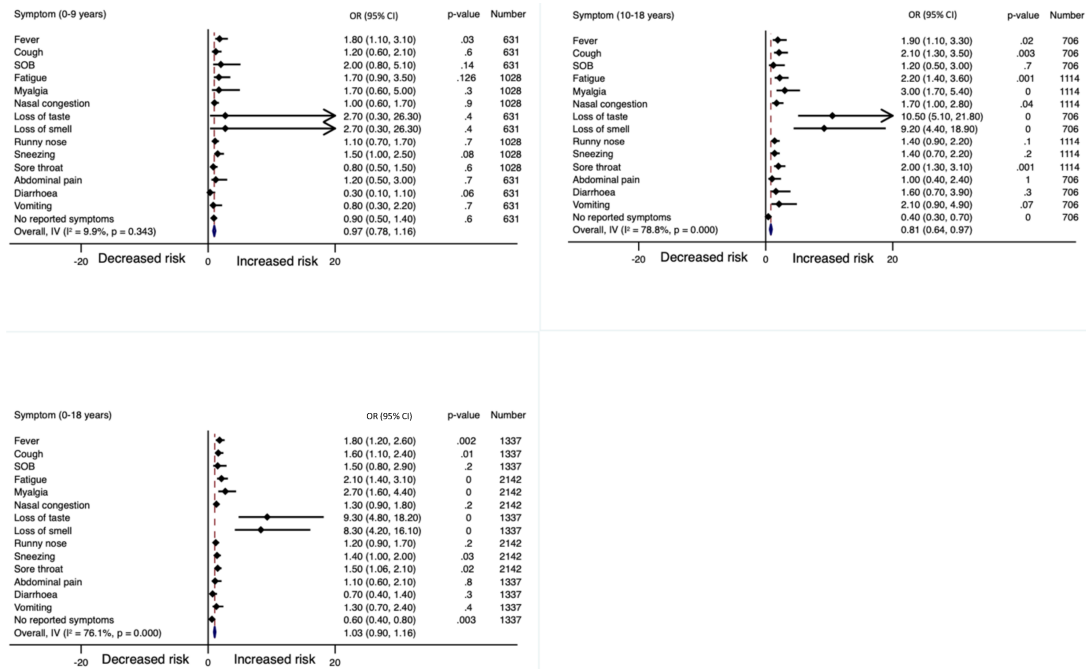

Figure 3b Univariate analysis of symptoms by age band (RocheN - Anti-SARS-CoV-2 IgG nucleocapsid antibodies)

Table 9a Logistic regression models to determine symptoms associated with positivity the RocheS - Anti-SARS-CoV-2 IgG spike protein antibodies assay results. Symptoms with the highest p-value were sequentially excluded and model Akaike Information Criterion (AIC) values were compared until a model with the lowest AIC value had been reached. Separate models created for 0-9 years and 10-18 years.

| <b>RocheS</b>                                      | <b>OR (95% CI)</b> | <b>p-value</b> |
|----------------------------------------------------|--------------------|----------------|
| <b>Age group: 0-9 years (N=663 observations)</b>   |                    |                |
| <b>Male</b>                                        | 1.0 (0.6-1.7)      | 0.89           |
| <b>Fever</b>                                       | 1.7 (1.0-2.9)      | 0.05           |
| <b>Gastrointestinal symptoms</b>                   | 0.6 (0.3-1.1)      | 0.09           |
| <b>Age group: 10-18 years (N=873 observations)</b> |                    |                |
| <b>Male</b>                                        | 0.9 (0.6-1.3)      | 0.57           |
| <b>Fever</b>                                       | 1.6 (1.0-2.7)      | 0.05           |
| <b>Loss of taste and smell</b>                     | 9.2 (5.1-16.3)     | <0.001         |

OR: odds ratio

Table 9b Logistic regression models to determine symptoms associated with positivity the RocheN - Anti-SARS-CoV-2 IgG nucleocapsid antibodies assay results. Symptoms with the highest p-value were sequentially excluded and model Akaike Information Criterion (AIC) values were compared until a model with the lowest AIC value had been reached. Separate models created for 0-9 years and 10-18 years.

| <b>RocheN</b>                                      | <b>OR (95% CI)</b> | <b>p-value</b> |
|----------------------------------------------------|--------------------|----------------|
| <b>Age group: 0-9 years (N=631 observations)</b>   |                    |                |
| <b>Male</b>                                        | 1.1 (0.6-1.8)      | 0.80           |
| <b>Fever</b>                                       | 2.1 (1.2-3.6)      | 0.009          |
| <b>Gastrointestinal symptoms</b>                   | 0.5 (0.3-1.1)      | 0.09           |
| <b>Age group: 10-18 years (N=873 observations)</b> |                    |                |
| <b>Male</b>                                        | 0.9 (0.6-1.4)      | 0.65           |
| <b>Cough</b>                                       | 1.6 (1.0-2.6)      | 0.07           |
| <b>Loss of taste or smell</b>                      | 8.0 (4.5-14.4)     | <0.001         |

OR: odds ratio

Table 10 A univariate and multivariable logistic regression models to establish risk of SARS-CoV-2 seropositivity on Roche Elecsys Anti-SARS-CoV-2 serological assays for the detection of anti-SARS-CoV-2 IgG nucleocapsid antibodies (RocheN) in children aged 0-18 years

| Number of participants in model                               | Univariate         |                   | IMD* deprivation quintiles |                    | Multivariable IDACI** deprivation quintiles |                   | IMD and incl. HCW‡  |                   |
|---------------------------------------------------------------|--------------------|-------------------|----------------------------|--------------------|---------------------------------------------|-------------------|---------------------|-------------------|
|                                                               | Odds ratio (95%CI) | LR test (p value) | Odds ratio (95% CI)        | LR test‡ (p value) | Odds ratio (95% CI)                         | LR test (p value) | Odds ratio (95% CI) | LR test (p value) |
|                                                               |                    |                   | 2285                       |                    | 2285                                        |                   | 1886                |                   |
| <b>Age group</b>                                              |                    |                   |                            |                    |                                             |                   |                     |                   |
| 0-4 years                                                     | 1.0 (0.7-1.6)      | 0.1               | 0.8 (0.5-1.3)              | 0.02               | 0.8 (0.1-1.3)                               | 0.02              | 0.8 (0.5-1.3)       | 0.07              |
| 5-9 years                                                     | 1.1 (0.7-1.6)      |                   | 1.1 (0.7-1.7)              |                    | 1.1 (0.7-1.7)                               |                   | 1.1 (0.7-1.6)       |                   |
| 10-14 years                                                   | 1 (ref)            |                   | 1 (ref)                    |                    | 1 (ref)                                     |                   | 1 (ref)             |                   |
| 15-18 years                                                   | 1.5 (1.1-2.2)      |                   | 1.6 (1.1-2.4)              |                    | 1.6 (1.1-2.4)                               |                   | 1.5 (1.0-2.2)       |                   |
| <b>Sex</b>                                                    |                    |                   |                            |                    |                                             |                   |                     |                   |
| Female                                                        | 1 (ref)            |                   | 1 (ref)                    |                    | 1 (ref)                                     |                   | 1 (ref)             |                   |
| Male                                                          | 0.9 (0.7-1.2)      | 0.7               | 1.0 (0.7-1.3)              | 0.9                | 1.0 (0.7-1.3)                               | 0.9               | 1.0 (0.7-1.3)       | 0.9               |
| <b>NHS region</b>                                             |                    |                   |                            |                    |                                             |                   |                     |                   |
| East of England                                               | 1.1 (0.5-2.6)      | <0.001            | 0.8 (0.3-2.0)              | <0.001             | 0.8 (0.3-2.0)                               | 0.001             | 0.9 (0.3-2.2)       | 0.001             |
| London                                                        | 5.5 (3.3-8.9)      |                   | 2.7 (1.6-4.7)              |                    | 2.6 (1.5-4.4)                               |                   | 2.7 (1.5-4.8)       |                   |
| Midlands                                                      | 1.7 (0.8-3.2)      |                   | 1.3 (0.6-2.6)              |                    | 1.2 (0.6-2.5)                               |                   | 1.2 (0.6-2.6)       |                   |
| North East and Yorkshire                                      | 2.3 (1.3-3.8)      |                   | 1.5 (0.9-2.7)              |                    | 1.5 (0.8-2.6)                               |                   | 1.5 (0.8-2.7)       |                   |
| North West                                                    | 4.5 (2.8-7.4)      |                   | 2.7 (1.5-4.9)              |                    | 2.6 (1.5-4.6)                               |                   | 2.7 (1.4-4.9)       |                   |
| South East                                                    | 1 (ref)            |                   | 1 (ref)                    |                    | 1 (ref)                                     |                   | 1 (ref)             |                   |
| South West                                                    | 1.7 (0.9-3.0)      |                   | 1.5 (0.8-2.7)              |                    | 1.5 (0.8-2.7)                               |                   | 1.5 (0.8-2.7)       |                   |
| <b>Time period</b>                                            |                    |                   |                            |                    |                                             |                   |                     |                   |
| Pre-pandemic (01 Oct 2019 - 31 Mar 2020)                      |                    | <0.001            |                            | <0.001             |                                             | <0.001            |                     | <0.001            |
| First wave (01 Apr 2020 - 31 May 2020)                        | 0.2 (0.1-0.4)      |                   | 0.2 (0.1-0.5)              |                    | 0.2 (0.1-0.5)                               |                   | 0.2 (0.1-0.5)       |                   |
| Post first wave (01 Jun 2020 - 31 Aug 2020)                   | 0.2 (0.1-0.4)      | <0.001            | 0.2 (0.1-0.3)              |                    | 0.2 (0.1-0.3)                               |                   | 0.2 (0.1-0.3)       |                   |
| Schools reopening and second wave (01 Sep 2020 - 31 Dec 2020) | 0.4 (0.2-0.6)      | <0.001            | 0.4 (0.3-0.6)              |                    | 0.4 (0.2-0.6)                               |                   | 0.4 (0.3-0.6)       |                   |
| Post second wave (01 Jan 2021 - 31 Mar 2021)                  | 1 (ref)            |                   | 1 (ref)                    |                    | 1 (ref)                                     |                   | 1 (ref)             |                   |
| Emergence of delta variant (01 Apr 2021 - 30 Jun 2021)        | 1.2 (0.8-1.7)      | 0.3               | 1.0 (0.7-1.6)              |                    | 1.0 (0.7-1.6)                               |                   | 1.0 (0.7-1.6)       |                   |
| <b>Ethnicity</b>                                              |                    |                   |                            |                    |                                             |                   |                     |                   |
| White                                                         | 1 (ref)            |                   | 1 (ref)                    |                    | 1 (ref)                                     |                   | 1 (ref)             |                   |
| Minority ethnic group ††                                      | 2.5 (1.9-3.5)      | <0.001            | 1.5 (1.0-2.1)              | 0.04               | 1.5 (1.0-2.1)                               | 0.04              | 1.4 (1.0-2.1)       | 0.06              |
| <b>IMD deprivation quintile</b>                               |                    |                   |                            |                    |                                             |                   |                     |                   |

|                                   |               |        |               |       |               |               |                      |
|-----------------------------------|---------------|--------|---------------|-------|---------------|---------------|----------------------|
| <b>Most deprived 1</b>            | 2.8 (1.8-4.2) | 0.002  | 1.5 (0.9-2.4) | 0.02  |               | 1.7 (1.0-2.9) | 0.009                |
| <b>2</b>                          | 1.4 (0.9-2.3) |        | 0.7 (0.4-1.2) |       |               | 0.7 (0.4-1.2) |                      |
| <b>3</b>                          | 1.5 (1.0-2.3) |        | 0.9 (0.6-1.5) |       |               | 1.0 (0.6-1.7) |                      |
| <b>4</b>                          | 1.7 (1.1-2.5) |        | 1.4 (0.9-2.2) |       |               | 1.5 (0.9-2.4) |                      |
| <b>Least deprived 5</b>           | 1 (ref)       |        | 1 (ref)       |       |               | 1 (ref)       |                      |
| <b>IDACI deprivation quintile</b> |               |        |               |       |               |               |                      |
| <b>Most deprived 1</b>            | 2.0 (1.3-2.9) | <0.001 |               |       | 1.2 (0.7-1.8) | 0.04          |                      |
| <b>2</b>                          | 1.0 (0.6-1.6) |        |               |       | 0.6 (0.4-1.0) |               |                      |
| <b>3</b>                          | 0.8 (0.5-1.3) |        |               |       | 0.6 (0.4-1.0) |               |                      |
| <b>4</b>                          | 1.0 (0.7-1.5) |        |               |       | 1.0 (0.6-1.5) |               |                      |
| <b>Least deprived 5</b>           | 1 (ref)       |        |               |       | 1 (ref)       |               |                      |
| <b>Urban/rural</b>                |               |        |               |       |               |               |                      |
| <b>Rural</b>                      | 0.2 (0.1-0.4) | <0.001 | 0.4 (0.2-0.8) | 0.002 | 0.4 (0.2-0.7) | <0.001        | 0.5 (0.2-0.9) 0.009  |
| <b>Urban</b>                      | 1 (ref)       |        | 1 (ref)       |       | 1 (ref)       |               | 1 (ref)              |
| <b>HCW †</b>                      |               |        |               |       |               |               |                      |
| <b>No</b>                         | 1 (ref)       |        |               |       |               |               | 1 (ref)              |
| <b>Yes</b>                        | 1.5 (1.1-2.0) | 0.003  |               |       |               |               | 1.7 (1.3-2.4) <0.001 |

\*IMD Index of Multiple Deprivation

\*\*IDACI Income Deprivation Affecting Children Index (IDACI) measures the proportion of all children aged 0 to 15 living in income deprived families

† fewer results available for this analysis due to incomplete data in HCW (healthcare worker) field (see Table 2)

†† Minority ethnic group includes all minority groups apart from white minorities

‡ Likelihood ratio for each risk factor calculated with overall p value displayed



Appendix 1 Questionnaire used in *What's the STORY? (Serum Testing Of Representative Youngsters)*Participant Number:    

Most of the questions below are taken from the UK census. They are included here to check how well the participants taking part in this study match those of the general population in your area. These data will be stored securely by your site and analysed anonymously in accordance with General Data Protection Regulation (GDPR).

Today's date: \_\_\_/\_\_\_/\_\_\_\_\_

- Q1. What is your child's date of birth? (month and year only)  
 Q2. What was their birth gender?      male                  female  
 Q3. Which country was your child born in?  
 Q4. How many years has your child lived in the UK?  
 Q5. Which country were you (the Parent/Guardian) born in?  
 Q6. How many years have you (the Parent/Guardian) lived in the UK?  
 Q7. In which country/countries did your child (the participant) receive their vaccinations?

UK Other

Q8. Does your child attend a childcare setting? **(This question is for under 5 year olds only)**

Yes no

If Yes which setting? Nursery  Childminder  Nanny  Other  Please specify \_\_\_\_\_

If the answer is yes to Q8, please indicate how many hours a week?

|             |             |            |
|-------------|-------------|------------|
| 1-4 hours   | 4-8 hours   | 8-12 hours |
| 12-20 hours | 21-30 hours | 30 + hours |

**The following questions is for school aged children**

- Q9. Is your child enrolled in full time education?  
 Yes No
- Q10. If yes to Q9, which setting are they being educated in?  
 Primary school  
 Middle school  
 Secondary school  
 College  
 Homeschooling  
 Other  please specify
- Q11. If in full time education please provide the name of the institution \_\_\_\_\_  
 or N/A  (if N/A please move to question 14)
- Q12. If enrolled at an institution, is it open? Yes no (if no please move to question 14)
- Q13. If your child's institution is open are they attending? Yes no N/A
- Q14. Who is your child's GP? \_\_\_\_\_
- Q15. Name and address of surgery \_\_\_\_\_
- Q16. Has your child had any symptoms such as those listed below since February 2020?

Fever

Dry Cough

Shortness of breath

Fatigue

Myalgia (muscle aches)

Nasal congestion

Loss of sense of taste

Loss of sense of smell

Runny nose

Sneezing

Sore throat  
 Abdominal pain or cramps (not including menstrual cramps)  
 Diarrhoea  
 Vomiting  
 Other Please specify \_\_\_\_\_  
 None of the above

- Q17. If yes to any of the symptoms in question 16, when was the **start** of their most recent episode of symptoms? DD/MM/2020 N/A
- Q18. Has your child ever been tested for COVID-19? (throat and/or nose swab specifically for COVID-19)  
 Yes No
- Q19. Has the result of your child's throat and/or nose swab for COVID-19 been positive?  
 Yes No N/A
- Q20. What was the date of the test? DD/MM/YYYY N/A
- Q21. Has your child ever been tested for COVID-19 antibodies (blood test/saliva test)?  
 Yes No
- Q22. If yes to Q21, has the result of your child's antibody testing been positive?
- Q23. Yes No N/A
- Q24. What was the date of the antibody test? DD/MM/YYYY N/A

**The following questions refer to any household contacts. A household contact is defined as a person who stays overnight in the same residence the participant.**

- Q25. Has anyone in your child's household(s) had a new loss of taste or smell since February 2020? Yes  
 No
- Q26. If yes to question 26, how many people in your child's household been affected? .....
- Q27. If yes to question 26 when was the **start** of their symptoms? DD/MM/2020
- Q28. If yes to question 26, how old are they?
- Q29. Has anyone in your child's household had any symptoms listed below since February 2020?  
 Fever  
 Dry cough  
 Shortness of breath  
 Muscle aches  
 Feeling tired  
 Loss of appetite  
 Abdominal pain or cramps (not including menstrual cramps)  
 Diarrhoea  
 Vomiting  
 Other Please specify \_\_\_\_\_  
 None of the above
- Q30. If yes to question 28, how many people in your child's household been affected? .....
- Q31. If yes to any symptoms in question 28, when was the start of their most recent episode of symptoms?  
 DD/MM/ YYYY If yes to any symptoms in question 28, how old are they?
- Q32. If yes to any symptoms in question 28 have they ever been tested for COVID-19? (throat and/or nose swab specifically for COVID-19) Yes No
- Q33. If yes to any symptoms in question 28 have they ever been diagnosed with laboratory confirmed throat and/or nose swab for COVID-19? Yes No
- Q34. If yes to question 33, when was their positive test? DD/MM/ YYYY Has the individual in question ever been tested for COVID-19 antibodies (blood test/saliva test)? Yes No N/A
- Q35. If yes to Q35, has the result of the individual's antibody testing been positive?
- Q36. Yes No N/A
- Q37. What was the date of the antibody test? DD/MM/ YYYY N/A
- Q38. Has anyone in the household without symptoms been tested for COVID-19? (throat and/or nose swab specifically for COVID-19) Yes No
- Q39. If yes to Q38 was it positive? Yes No

Q40. What was the date of the test? DD/MM/ YYYY N/A

Q41. Has anyone in the household without symptoms been tested for COVID-19 antibodies (blood test/saliva test)? Yes No N/A

Q42. If yes to Q40 was it positive? Yes No

Q43. What was the date of the antibody test? DD/MM/ YYYY N/A

**Q44. Which of the following best describes **your child?** (the participant)**

**White**

English/Welsh/Scottish/Northern Irish/ British

Irish

Gypsy or Irish Traveller

Other White background please specify .....

**Mixed/ multiple ethnic groups**

White and Black Caribbean

White and Black African

White and Asian

Any other mixed/ multiple ethnic background please specify

**Asian/ Asian British**

Indian

Pakistani

Bangladeshi

Chinese

Any other Asian background please specify

**Black/ African/ Caribbean/Black British**

African

Caribbean

Any other Black/ African/ Caribbean background please specify

**Other ethnic group**

Arab

Any other ethnic group please specify What is **your child's** (the participant) religion? (This question is optional)

No religion

Christian (including Church of England, Catholic, Protestant and all other Christian denominations)

Buddhist

Hindu

Jewish

Muslim

Sikh

Other please specify

Prefer not to say

Please complete questions 46 -59 for the main household in which your child lives?

Q45. How many adults (16+ years old)?

Q46. How many children (under the age of 16)?

Q47. How would you describe the main household?

A whole house or bungalow that is:

Detached

Semidetached

Terraced (including end-terrace)

A flat, maisonette or apartment that is:

In a purpose built block of flats or tenement

Part of a converted or shared house (including bedsits)

In a commercial building (for example, in an office building, hotel, or over a shop)

A mobile or temporary structure

A caravan or other mobile or temporary structure

Q48. Is this household's accommodation self-contained?

This means that all the rooms, including the kitchen, bathroom and toilet, are behind a door that only this household can use:

Yes, all the rooms are behind a door that only this household can use

No

Q49. How many rooms are available for use only by this household?

Do **NOT** count

Bathrooms

Toilets

Halls or landing

Rooms that can only be used for storage such as cupboards

**Count** all other rooms e.g.

Kitchens

Living rooms

Utility rooms

Bedrooms

Studies

Conservatories

If two rooms have been converted into one, count them as one room

Number of rooms .....

How many of these rooms are bedrooms? Include all rooms built or converted for use as bedrooms even if they are not currently used as bedrooms

Number of rooms .....

Q50. Which of the following best describes your child's household's current accommodation?

Own your own home outright

Own your home with a mortgage

Renting from the council

Renting from a housing association

Renting from a private landlord

In shared accommodation with a housing association

Living with relatives

In housing tied to your job

Lodging within another household

Other Please specify

Q51. Your employment – Parent or Guardian to answer (please select only one as your main form of employment)

Working full time

Working part time  
 Unemployed  
 Retired  
 In full time or further education  
 Claiming Job Seekers Allowance  
 Incapacity Benefit  
 Other

Q52. Does anyone in the household work in either social care or health care?

Yes  
 No

Thinking about your child's immediate family (parents and siblings in the same household) please can you tell us the following?

Q53. Does your family own a car, van or truck (include company cars or vans available for private use)?

None  
 One  
 Two  
 Three  
 Four or more

Q54. Does your child have their own bedroom to themselves?

No  
 Yes

Q55. How many computers does your family own? (including laptops and tablets, not including games consoles and smartphones)

None  
 One  
 Two  
 More than two

Q56. How many bathrooms (room with a bath/shower or both) are in your home?

None  
 One  
 Two  
 More than two

Q57. Does your family have a dishwasher at home?

No  
 Yes

Q58. How many times did you travel out of the UK for a holiday/vacation last year either alone or with friends/family (in the 12 months preceding lockdown for COVID-19)?

Not at all  
 Once  
 Twice  
 More than Twice

Table 10 STORY research team

| Name         | Research Group      |
|--------------|---------------------|
| K. Bell      | Newcastle NHS Trust |
| C. Kennedy   | Newcastle NHS Trust |
| A. Bell      | Newcastle NHS Trust |
| C. L. Coates | Newcastle NHS Trust |
| S. Crulley   | Newcastle NHS Trust |
| A. Davies    | Newcastle NHS Trust |

|                   |                                                                                                           |
|-------------------|-----------------------------------------------------------------------------------------------------------|
| S. King           | Newcastle NHS Trust                                                                                       |
| D.T.J. Metcalfe   | Newcastle NHS Trust                                                                                       |
| C. Reigan         | Newcastle NHS Trust                                                                                       |
| D.T.J. Fabian     | Newcastle NHS Trust                                                                                       |
| R.A. Sarjeant     | Newcastle NHS Trust                                                                                       |
| C. Smith          | Newcastle NHS Trust                                                                                       |
| L.B. Baxter       | Newcastle NHS Trust                                                                                       |
| E. Thompson       | Newcastle NHS Trust                                                                                       |
| R. Wane           | Bradford Children's Research Team                                                                         |
| R. Swingle        | Bradford Children's Research Team                                                                         |
| C. Bass-Woodcock  | Bradford Children's Research Team                                                                         |
| L. Ingram         | Bradford Children's Research Team                                                                         |
| J. Pearce         | St George's Vaccine Institute, St George's University Hospital NHS Trust/St George's University of London |
| C. Hultin         | St George's Vaccine Institute, St George's University Hospital NHS Trust/St George's University of London |
| J.I. Pereira      | St George's Vaccine Institute, St George's University Hospital NHS Trust/St George's University of London |
| H. Foife          | St George's Vaccine Institute, St George's University Hospital NHS Trust/St George's University of London |
| P. Fox            | St George's Vaccine Institute, St George's University Hospital NHS Trust/St George's University of London |
| E. Stefanova      | St George's Vaccine Institute, St George's University Hospital NHS Trust/St George's University of London |
| F. Mabesa         | St George's Vaccine Institute, St George's University Hospital NHS Trust/St George's University of London |
| S. Hawkins        | Oxford Vaccine Group                                                                                      |
| V.H. Murphy       | Oxford Vaccine Group                                                                                      |
| J. Muller         | Oxford Vaccine Group                                                                                      |
| R. Cooper         | Oxford Vaccine Group                                                                                      |
| R. White          | Oxford Vaccine Group                                                                                      |
| S. Koleva         | Oxford Vaccine Group                                                                                      |
| D.T.J. Kerr       | Oxford Vaccine Group                                                                                      |
| R. Drake-Brockman | Oxford Vaccine Group                                                                                      |
| J. McEwan         | Oxford Vaccine Group                                                                                      |
| H. Roberts        | Oxford Vaccine Group                                                                                      |
| K. O'Brien        | Oxford Vaccine Group                                                                                      |
| A. Yao            | Oxford Vaccine Group                                                                                      |
| H. Trari Belhade  | Oxford Vaccine Group                                                                                      |
| H. Robinson       | Oxford Vaccine Group                                                                                      |
| S. Roberts        | Bristol Vaccine Centre (BVC)                                                                              |

|                   |                                                                                     |
|-------------------|-------------------------------------------------------------------------------------|
| E.B. Burch        | Bristol Vaccine Centre (BVC)                                                        |
| S. Thomson-Hill   | Bristol Vaccine Centre (BVC)                                                        |
| K. Jahans-Baynton | Bristol Vaccine Centre (BVC)                                                        |
| Z.B. Jordan       | Bristol Vaccine Centre (BVC)                                                        |
| D. Ellis          | Leeds Teaching Hospitals NHS Trust                                                  |
| R. Lidstone-Scott | Leeds Teaching Hospitals NHS Trust                                                  |
| E. Storr          | Plymouth NHS trust                                                                  |
| A. Carney         | Plymouth NHS trust                                                                  |
| S. Sharman        | Plymouth NHS trust                                                                  |
| N.J. Oldfield     | University of Nottingham Health Service                                             |
| S. Royal          | University of Nottingham Health Service                                             |
| S. Belton         | University of Nottingham Health Service                                             |
| D. Hammersley     | University of Nottingham Health Service                                             |
| J. Wilson         | Royal Manchester Children's Hospital                                                |
| N. Philips        | Royal Manchester Children's Hospital                                                |
| F. Jennings       | Royal Manchester Children's Hospital                                                |
| I. Mayor          | Royal Manchester Children's Hospital                                                |
| K. Wilkins        | Royal Manchester Children's Hospital                                                |
| S. Williams       | Royal Manchester Children's Hospital                                                |
| S. Akter          | Royal Manchester Children's Hospital                                                |
| E. Ashworth       | Royal Manchester Children's Hospital                                                |
| H. Dalglish       | Royal Manchester Children's Hospital                                                |
| A. Wheeler        | Royal Manchester Children's Hospital                                                |
| S. Persand        | Imperial College London                                                             |
| S.J. Burrell      | Imperial College London                                                             |
| R. Harrison       | Sheffield Children's Hospital NHS Trust                                             |
| S.J. Hill         | Sheffield Children's Hospital NHS Trust                                             |
| S. Gormley        | Sheffield Children's Hospital NHS Trust                                             |
| R. Owens          | University Hospital Southampton NHS Foundation Trust and University of Southampton. |
| P.S. Munro        | University Hospital Southampton NHS Foundation Trust and University of Southampton. |
